# Supplementary material
Source: ML conference proceedings conference paper supplement (https://openaccess.thecvf.com/content/ICCV2023/html/Zhu_All-to-Key_Attention_for_ICCV_2023_paper.html)
Supplement: Supplementary file 1 [file Zhu_All-to-Key_Attention_for_ICCV_2023_supplemental.pdf]

# All-to-key Attention for Arbitrary Style Transfer

## Supplementary Material

Mingrui Zhu\*  
Xidian University  
Xi'an, China

mrzhu@xidian.edu.cn

Xiao He\*  
Xidian University  
Xi'an, China

xiaoh@stu.xidian.edu.cn

Nannan Wang†  
Xidian University  
Xi'an, China

nnwang@xidian.edu.cn

Xiaoyu Wang  
The Hong Kong University of Science  
and Technology (Guangzhou)  
Guangzhou, China

fanguaxue@gmail.com

Xinbo Gao  
Chongqing University of Post and  
Telecommunications  
Chongqing, China

gaoxb@cqupt.edu.cn

## 1. Implementation Details

### 1.1. Step 1 of DA

Figure 1 provides a detailed illustration of the first step in distributed attention (DA). The first step of DA is regional style aggregation. In this step, we aggregate the information of all points in a block to a point, representing the block's style information. For example, we aggregate  $K_1, K_2, K_3$ , and  $K_4$  points in the first block of  $K^l$  to a point  $k$ . Note that all blocks perform regional style aggregation operations in parallel, so we will finally get the regional style representations corresponding to all blocks, which form new keys  $\tilde{K}^l$ .

### 1.2. Step 1 of PA

Figure 2 gives a detailed illustration of the first step in progressive attention (PA). The first step of PA is implemented as patch-wise attention along the first axis, which takes a block region as a token instead of a specific position. In this step, we apply  $\text{argmax}$  to the attention score to obtain the indices of the most similar coarse-grained region. For example, the 4th block region in  $K^l$  is matched as the coarse-grained region most similar to the blue block region in  $Q^l$ , so the index of this region is set to 4. With the indices, we can reshuffle the tokens of  $K^l$  to semantically match the spatial arrangement of the tokens of  $Q^l$ . The reshuffled  $\tilde{K}^l$  is further utilized in the second step of PA.

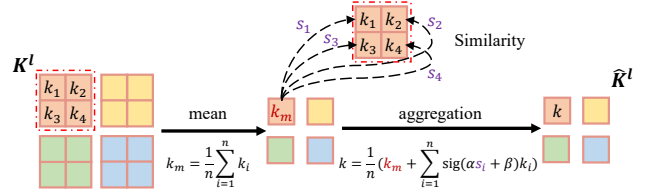

Figure 1. Detailed illustration of the step 1 in DA.

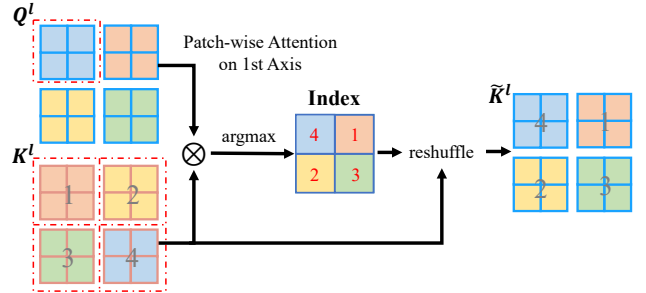

Figure 2. Detailed illustration of the step 1 in PA.

### 1.3. Decoder Architecture

The decoder implemented in this work follows the setting of [1], which mirrors the encoder and takes the multi-scale transferred features as input. Full decoder configuration is shown in Table 1. The decoder takes the multi-scale transferred features  $F_{cs}^l$  as input and gradually synthesizes the final image  $I_{cs}$ .

### 1.4. All-to-key Attention Algorithm

The PyTorch code for our proposed all-to-key attention mechanism is shown in Algorithm 1. The implementation

\*Both authors contributed equally to this work.

†Corresponding author: Nannan Wang.

Table 1. Full configuration of the decoder.

| Stage | Output                                      | Architecture                                                                                                            |
|-------|---------------------------------------------|-------------------------------------------------------------------------------------------------------------------------|
| $F^5$ | $512 \times \frac{H}{8} \times \frac{W}{8}$ | Input $F_{cs}^5$<br>Upsample scale 2<br>Add $F_{cs}^4$<br>$3 \times 3$ Conv, 512, ReLU                                  |
| $F^4$ | $256 \times \frac{H}{4} \times \frac{W}{4}$ | $3 \times 3$ Conv, 256, ReLU<br>Upsample scale 2                                                                        |
| $F^3$ | $128 \times \frac{H}{2} \times \frac{W}{2}$ | Concatenate $F_{cs}^3$<br>$(3 \times 3$ Conv, 256, ReLU) $\times 3$<br>$3 \times 3$ Conv, 128, ReLU<br>Upsample scale 2 |
| $F^2$ | $64 \times H \times W$                      | $3 \times 3$ Conv, 128, ReLU<br>$3 \times 3$ Conv, 64, ReLU<br>Upsample scale 2                                         |
| $F^1$ | $3 \times H \times W$                       | $3 \times 3$ Conv, 64, ReLU<br>$3 \times 3$ Conv, 3                                                                     |

Table 2. Evaluation scores of the results generated under different ratios. The best results are in **bold**.

| $\lambda_2$ | Content Loss $\downarrow$ | Style Loss $\downarrow$ | LPIPS $\downarrow$ |
|-------------|---------------------------|-------------------------|--------------------|
| 0.5         | 0.72                      | <b>0.75</b>             | 0.57               |
| 0.75        | 0.63                      | 0.82                    | 0.55               |
| 1           | 0.58                      | 0.98                    | 0.54               |
| 1.25        | 0.55                      | 1.04                    | 0.53               |
| 1.5         | 0.52                      | 1.20                    | 0.52               |
| 2           | <b>0.49</b>               | 1.38                    | <b>0.49</b>        |

is elegant with the usage of einsum notation.

### 1.5. Blocking and Unblocking Algorithm

The PyTorch code for feature blocking and unblocking operation in the all-to-key attention mechanism is shown in Algorithm 2

### 1.6. Loss Function

**Setting of  $\lambda_1$  and  $\lambda_2$**  We empirically set the weight of each loss term to 10 and 1.25. Since we only have two loss terms, we can fix the weight of one loss and choose the appropriate weight according to the impact of adjusting the weight of another loss. We fix  $\lambda_1$  to 10 and statistically analyze the evaluation scores of the results generated under different settings of  $\lambda_2$ , as shown in Table 2. As the proportion of  $\lambda_2$  increases, content loss, LPIPS score decreases, and style loss increases. Therefore, there is a trade-off in style and content. We finally set  $\lambda_2$  to 1.25 to render consistent style texture while maintaining semantic structure.

## 2. More Results

### 2.1. All-to-key Attention VS. All-to-all Attention

To further illustrate the superiority of our proposed all-to-key attention to all-to-all attention in producing high-

quality stylized images, we provide more visual comparisons in Figure 3. By replacing all-to-key attention in our full model with all-to-all attention, the visual quality of the stylized images decreases significantly, affected by distorted style patterns.

### 2.2. Arbitrary Style Transfer

To further demonstrate the effectiveness and robustness of our proposed StyA2K on arbitrary style transfer, we provide more stylization results of pair-wise combinations between 10 content images and 8 style images (total 80 stylized images) in Figure 4 and Figure 5. Our method can faithfully generate visually appealing results with consistent style textures. We also provide more video stylization results, as shown in Figure 6. StyleA2K shows high temporal consistency.

## References

- [1] Songhua Liu, Tianwei Lin, Dongliang He, Fu Li, Meiling Wang, Xin Li, Zhengxing Sun, Qian Li, and Errui Ding. Adaattn: Revisit attention mechanism in arbitrary neural style transfer. In *Proceedings of the IEEE/CVF international conference on computer vision*, pages 6649–6658, 2021.

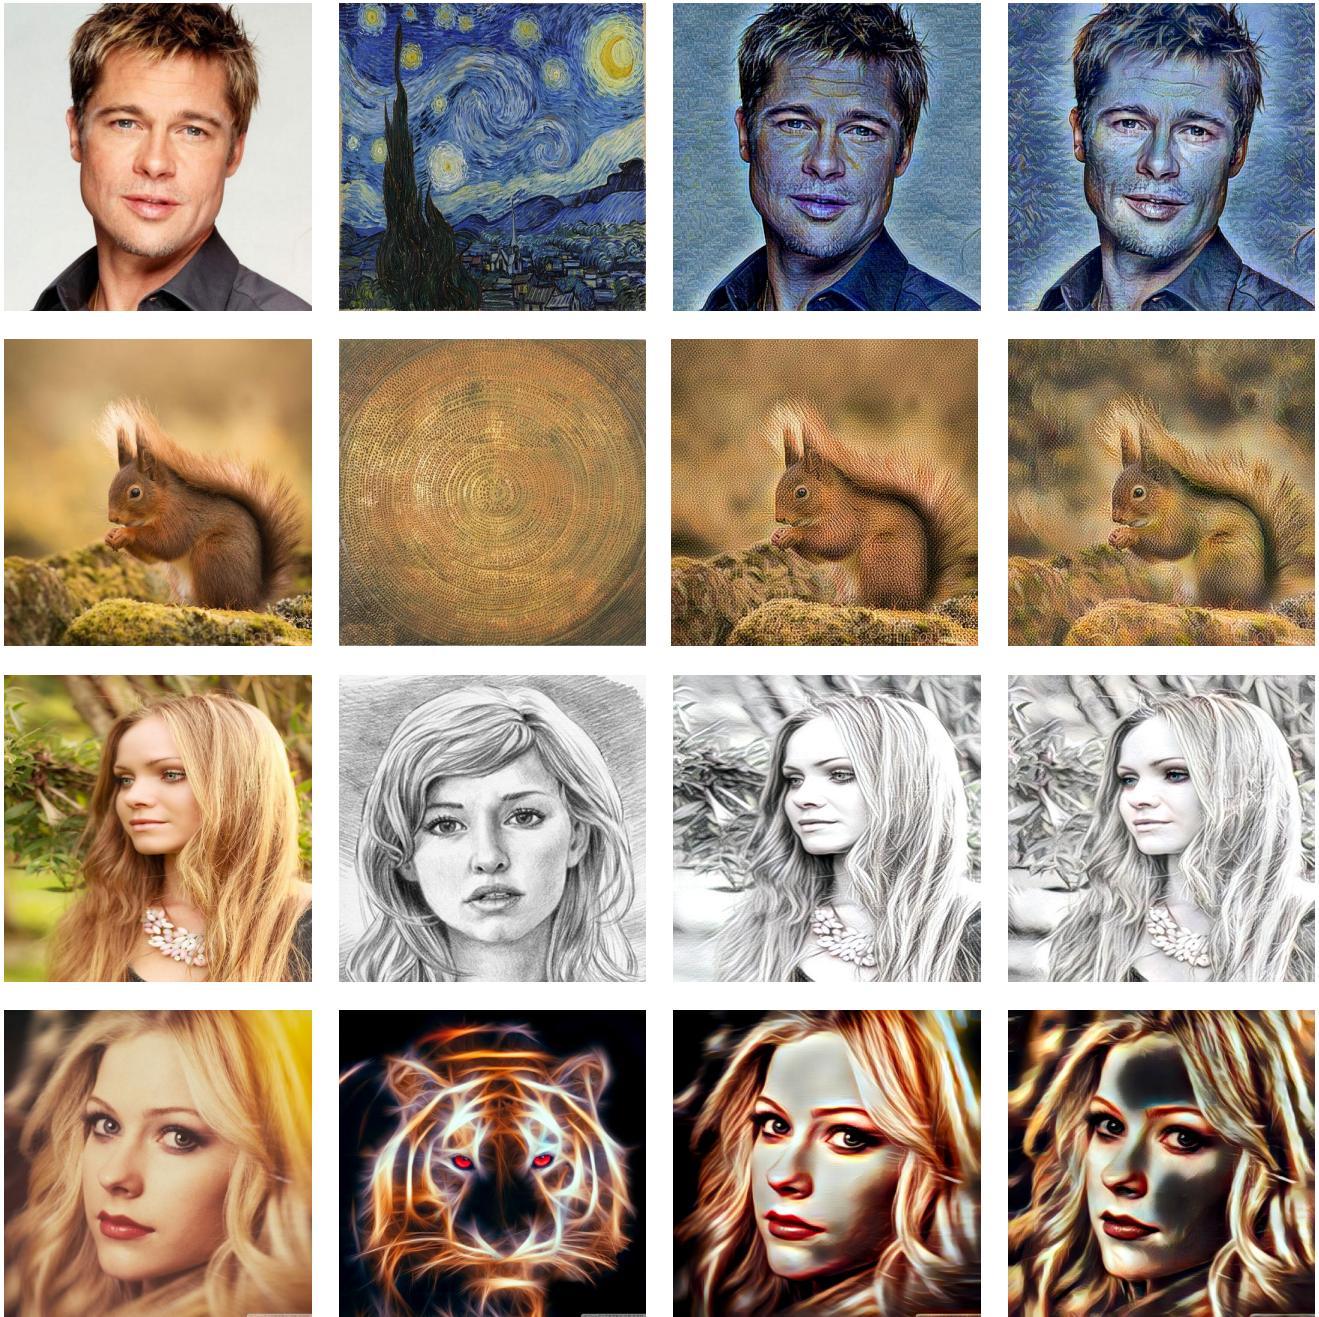

Content

Style

All-to-key Attention

All-to-all Attention

Figure 3. More visual comparisons between our proposed all-to-key attention and all-to-all attention.

---

**Algorithm 1** Pytorch code implementing all-to-key attention.

---

```
1 class A2K(nn.Module):
2     '''All-to-key Attention'''
3     def __init__(self, in_dim):
4         super().__init__()
5         self.Dq = nn.Conv2d(in_dim, in_dim, (1, 1))
6         self.Dk = nn.Conv2d(in_dim, in_dim, (1, 1))
7         self.Dv = nn.Conv2d(in_dim, in_dim, (1, 1))
8         self.Pq = nn.Conv2d(in_dim, in_dim, (1, 1))
9         self.Pk = nn.Conv2d(in_dim, in_dim, (1, 1))
10        self.Pv = nn.Conv2d(in_dim, in_dim, (1, 1))
11        self.sim_alpha = nn.Parameter(torch.ones(1), require_grad=True)
12        self.sim_beta = nn.Parameter(torch.zeros(1), require_grad=True)
13        self.fusion_D = nn.Conv2d(in_dim, in_dim, (1, 1))
14        self.fusion_P = nn.Conv2d(in_dim, in_dim, (1, 1))
15
16    def forward(self, content, style):
17        # Get Q K V
18        DA_q = block(self.Dq(mean_variance_norm(content)), p_size, stride)
19        DA_k = block(self.Dk(mean_variance_norm(style)), p_size, stride)
20        DA_v = block(self.Dv((style)), p_size, stride)
21        PA_q = block(self.Pq(mean_variance_norm(content)), p_size, stride)
22        PA_k = block(self.Pk(mean_variance_norm(style)), p_size, stride)
23        PA_v = block(self.Pv(style), p_size, stride)
24        # Distributed Attention Step 1
25        DA_k_m = torch.mean(DA_k, dim=-1)
26        DA_v_m = torch.mean(DA_v, dim=-1)
27        dis = torch.einsum("bhcx,bhcx->bhxy", DA_k_m, DA_k)
28        sim = torch.sigmoid(self.sim_beta+self.sim_alpha*dis)
29        DA_k_a = (torch.einsum("bhxy,bhcx->bhcx", sim, DA_k) + DA_k_m) / p_size
30        DA_v_a = (torch.einsum("bhxy,bhcx->bhcx", sim, DA_v) + DA_v_m) / p_size
31        # Distributed Attention Step 2
32        logits = torch.einsum("bhcx,bhcz->bhyxz", DA_q, DA_k_a)
33        scores = softmax(logits)
34        DA = torch.einsum("bhyxz,bhcz->bhcx", scores, DA_v_a)
35        DA_unblock = unblock(DA)
36        # Progressive Attention Step 1
37        PA1_logits = torch.einsum("bhcx,bhcz->bhxz", PA_q, PA_k)
38        index = torch.argmax(PA1_logits, dim = -1).expand_as(PA_k)
39        PA_k_reshuffle = torch.gather(PA_k, -2, index)
40        PA_V_reshuffle = torch.gather(PA_v, -2, index)
41        # Progressive Attention Step 2
42        logits2 = torch.einsum("bhcx,bhcx->bhxyz", PA_q, PA_k_reshuffle)
43        scores2 = softmax(logits2)
44        PA = torch.einsum("bxyz,bhcx->bhcx", scores2, PA_V_reshuffle)
45        PA_unblock = unblock(O2)
46        # Feature Transformation
47        O_DA = self.fusion_D(DA_unblock)
48        O_PA = self.fusion_P(PA_unblock)
49        O = O_DA + O_PA
50        out = O + Content
51        return out
```

---

---

**Algorithm 2** Pytorch code implementing feature blocking and unblocking.

---

```
1 def block(X, patch_size, stride):
2     '''feature blocking.
3     Args:
4         X: a tensor with shape [b, c, h, w], where b is batch size, c is the
5         channel dimension, h is feature height, and w is feature width.
6         patch_size: an integer for the patch (block) size
7         stride: the parameter of torch.nn.functional.unfold
8     Returns:
9         Y: a tensor with shape [b, c, n, r], where n is patch sequence length
10        and r is the patch size.
11    '''
12    b, c, h, w = X.shape
13    r = int(patch_size**2)
14    Y = torch.nn.functional.unfold(X, kernel_size=patch_size, stride=stride)
15    Y = Y.view(b, c, r, -1).permute(0, 1, 3, 2)
16    return Y
17
18 def unblock(X, patch_size, stride, h):
19     '''feature unblocking.
20     Args:
21         X: a tensor with shape [b, c, n, r], where b is batch size, c is
22         channel dimension, n is patch sequence length, r is the patch size.
23         patch_size: an integer for the patch (block) size
24         stride: the parameter of torch.nn.functional.unfold
25         h: the output height of the feature
26     Returns:
27         Y: a tensor with shape [b, c, h, w], where h is feature height
28        and w is feature width.
29    '''
30    b, c, n, r = X.shape
31    X = X.permute(0, 2, 1, 3)
32    X = X.contiguous().view(b, n, -1).permute(0, 2, 1)
33    Y = torch.nn.functional.unfold(X, h, kernel_size=patch_size, stride=stride)
34    return Y
```

---

Style  
Content

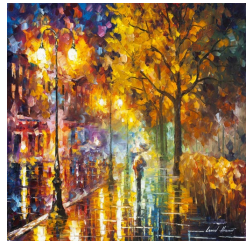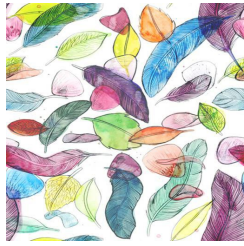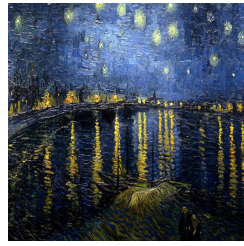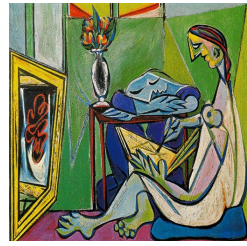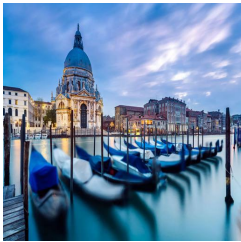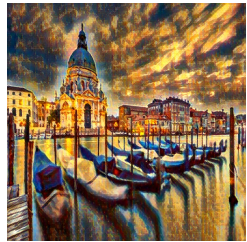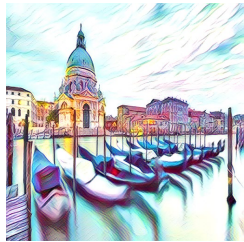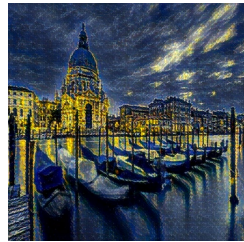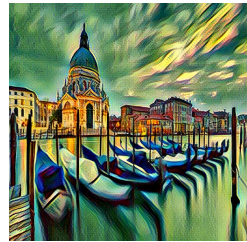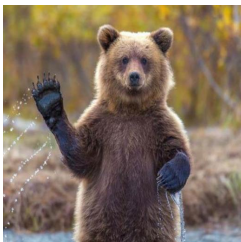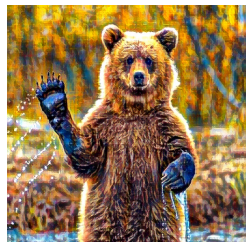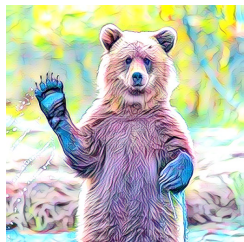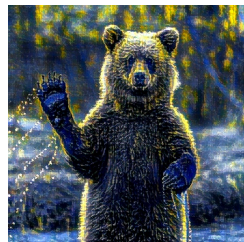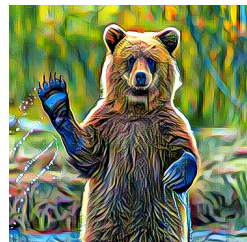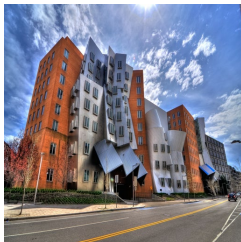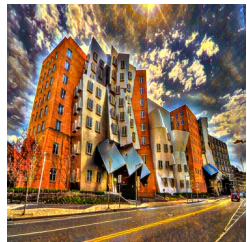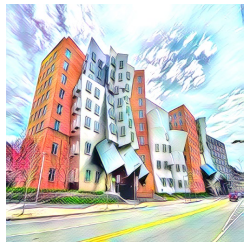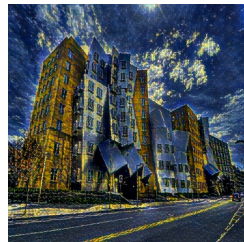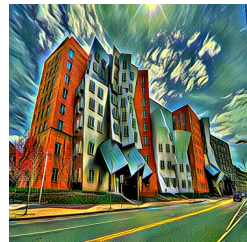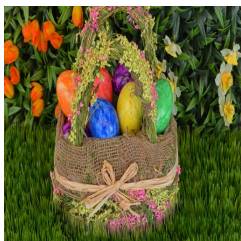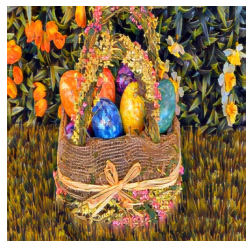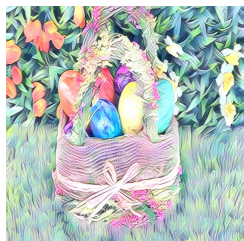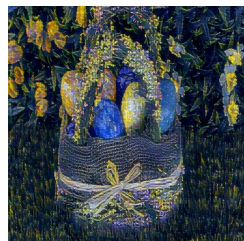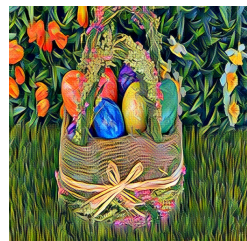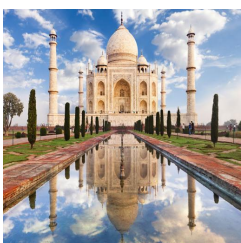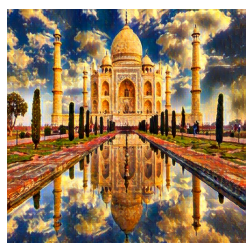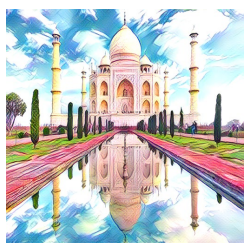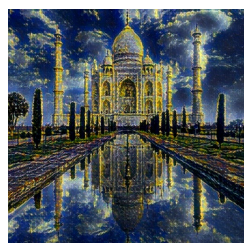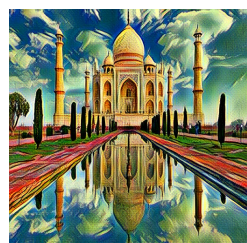

Figure 4. More image stylization results.

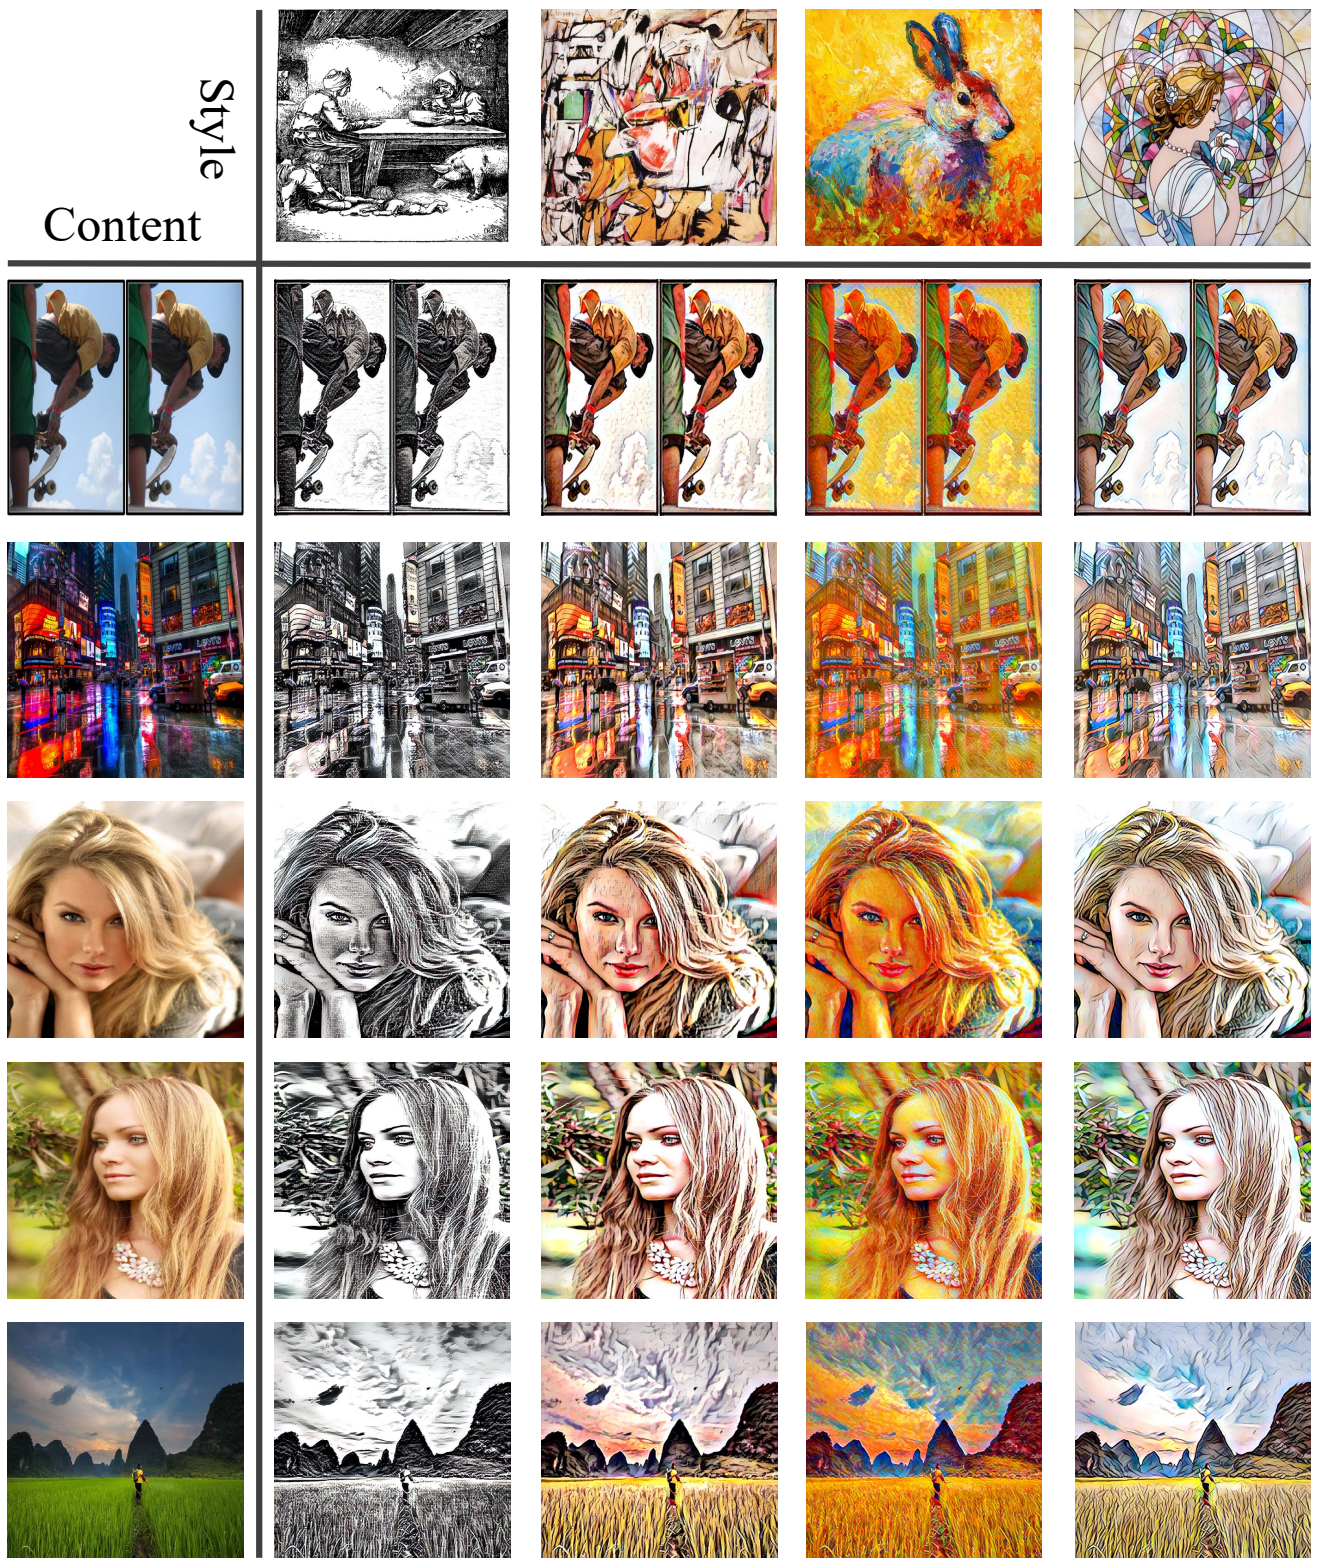

Figure 5. More image stylization results.

Figure 6. Video stylization results of AdaAttN (second column) and our StyA2K (third column). Adobe Acrobat is recommended to view the videos.
